# Supplementary material for: Extracellular vesicle miR-93-5p cargo regulates glomerular endothelial cell damage in Alport syndrome
Source: JCI journal article supplement (doi:10.1172/jci.insight.197643), 2026-03-23

## Original WB for all Figures

Extracellular vesicle-miR-93-5p cargo regulates glomerular endothelial cell damage in Alport syndrome.

Charmi Dedhia, Valentina Villani, Xiaogang Hou, Paolo Neviani, Jeremy Clair, Mohammadreza Kasravi, Cristina Grange, Paolo Cravedi, Paola Aguiari, Velia Alcala, Giuseppe Orlando, Xue-Ying Song, Johnathan E Zuckerman, Roger E De Filippo, Stefano Da Sacco, Sargis Sedrakyan, Benedetta Bussolati, Laura Perin

Figure 3B

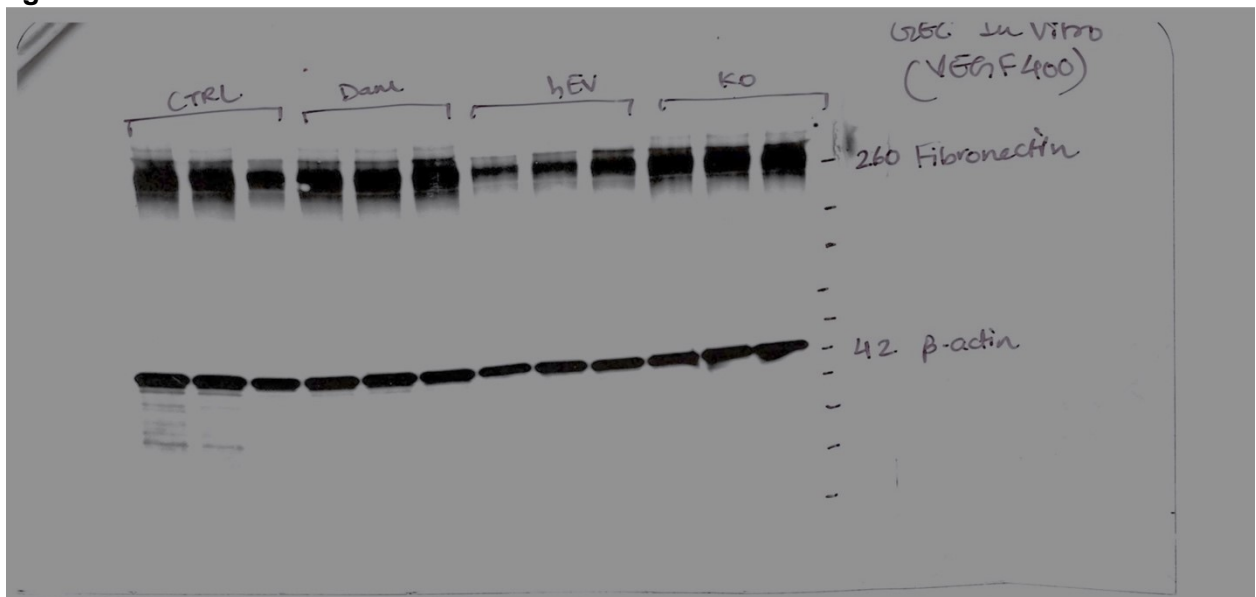

Figure 3D

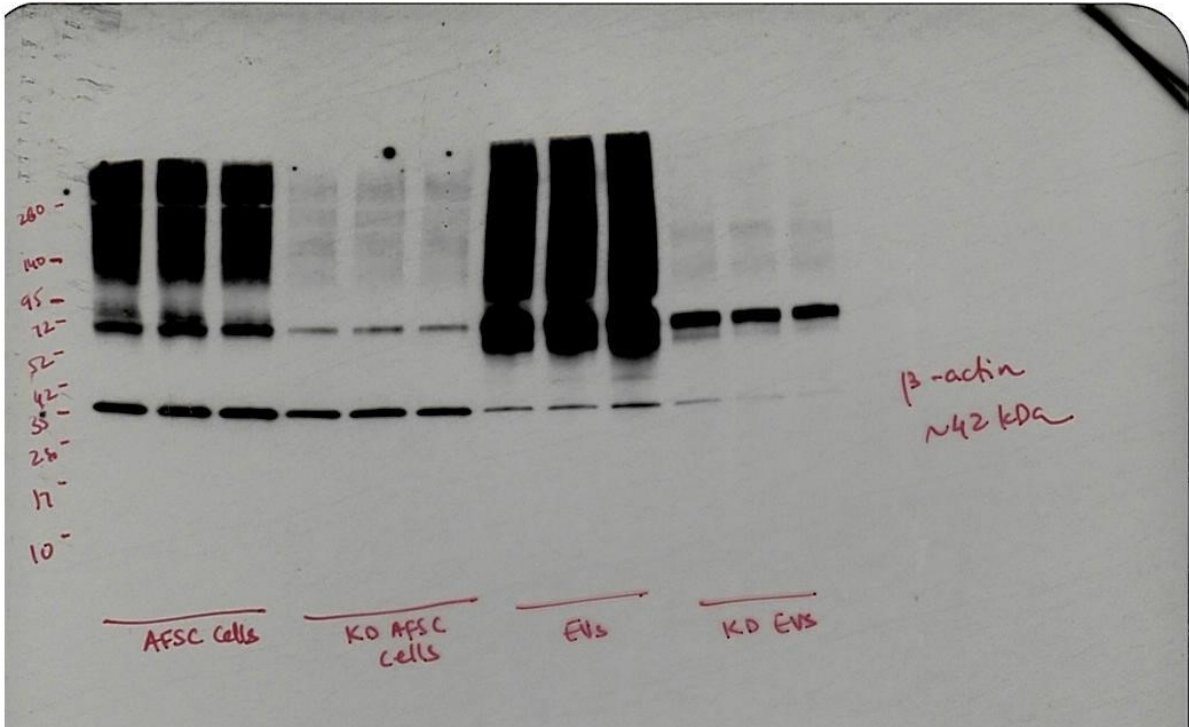

Figure 3E

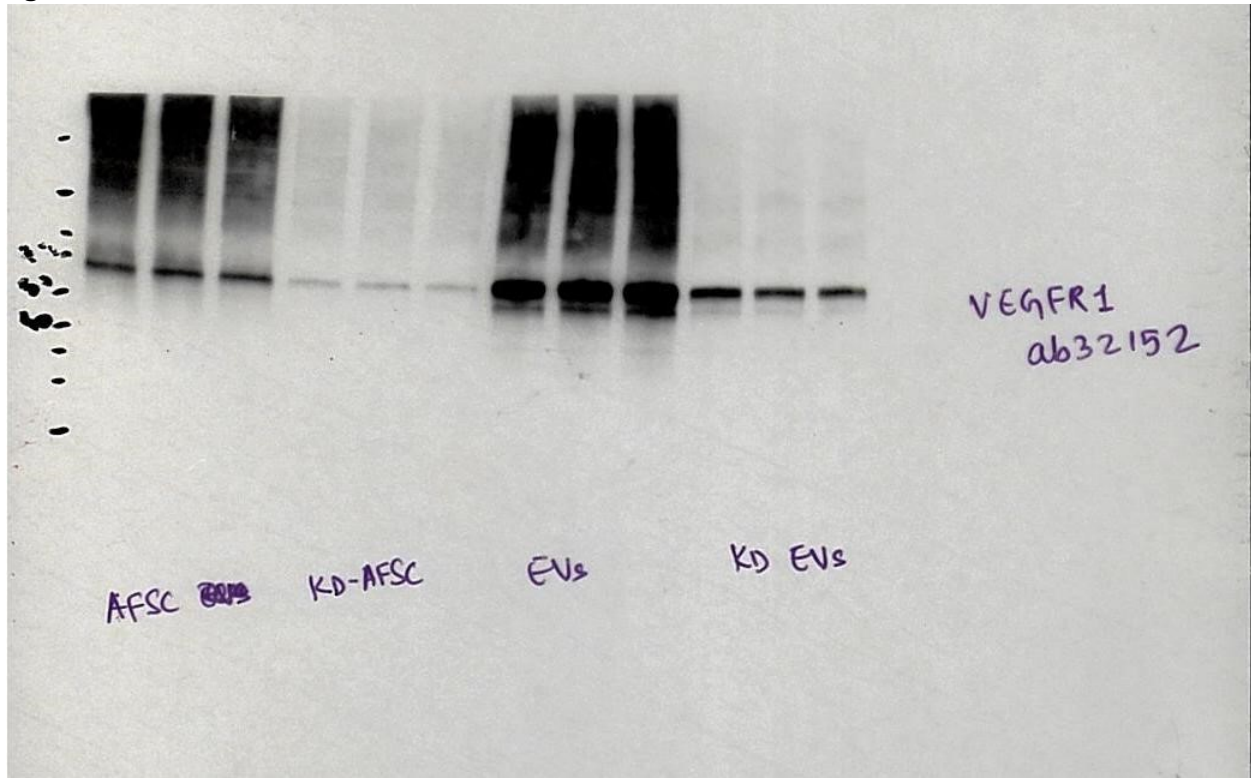

Figure 3F

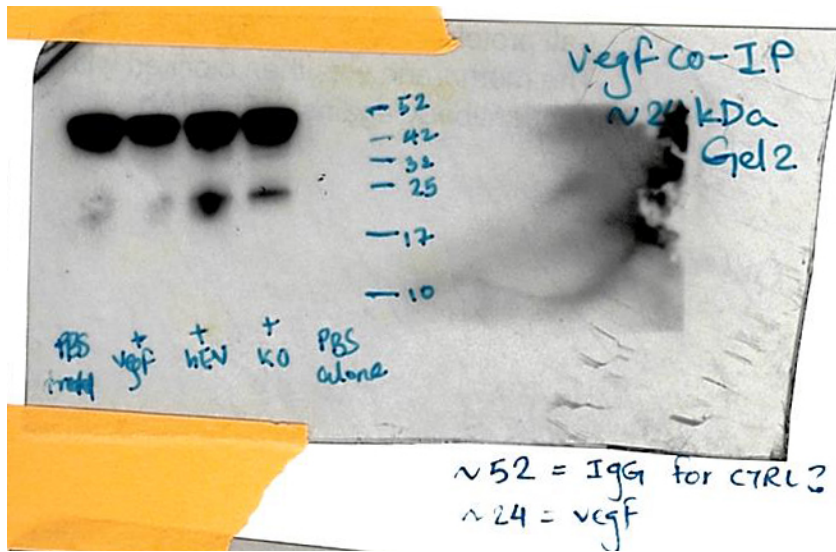

Figure 3G

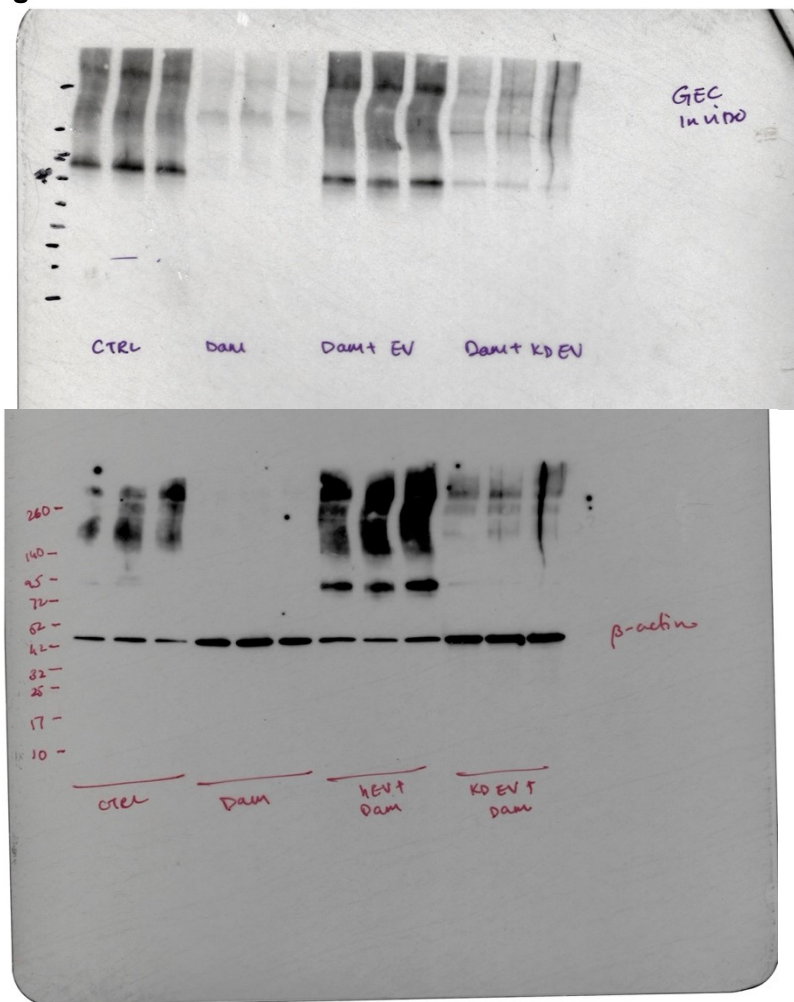

Figure 3H

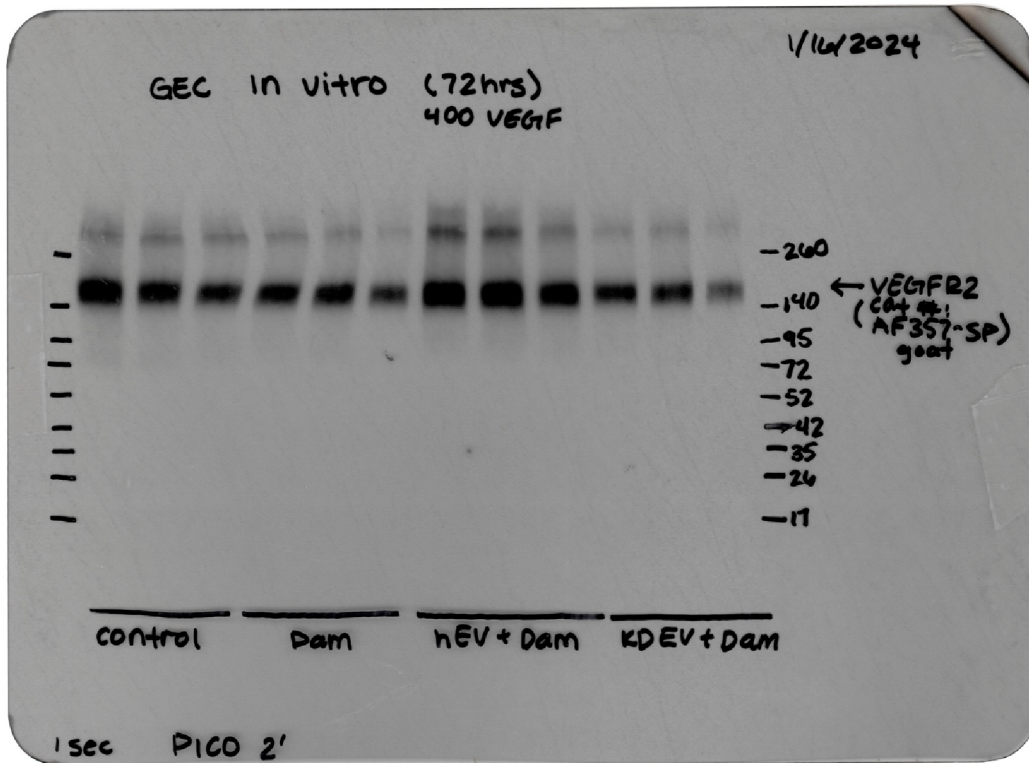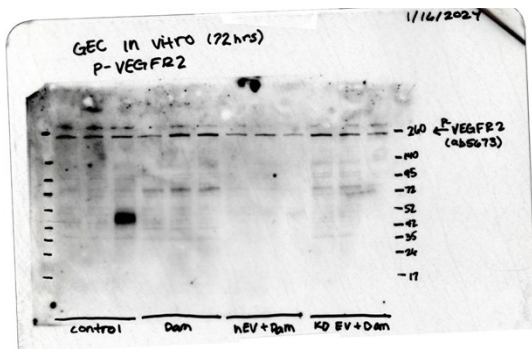

**Figure 5H**

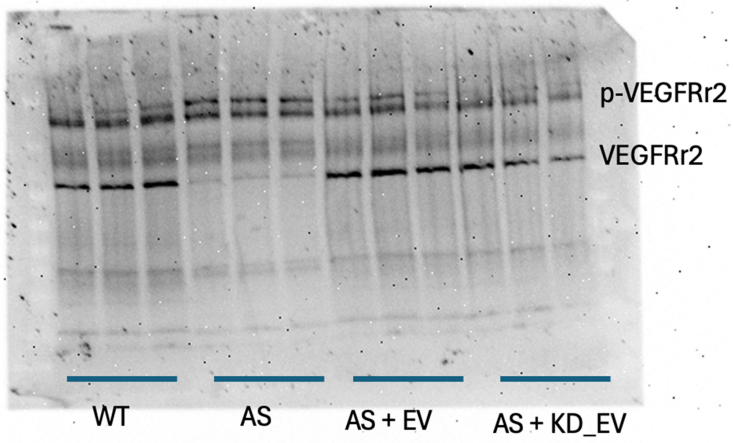

**Figure 5I**

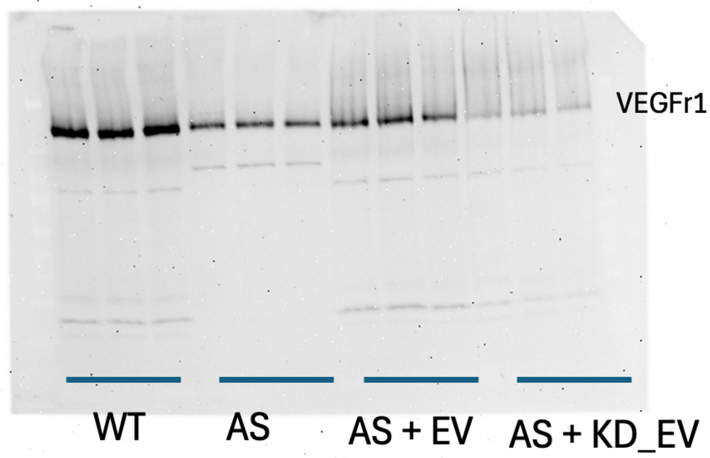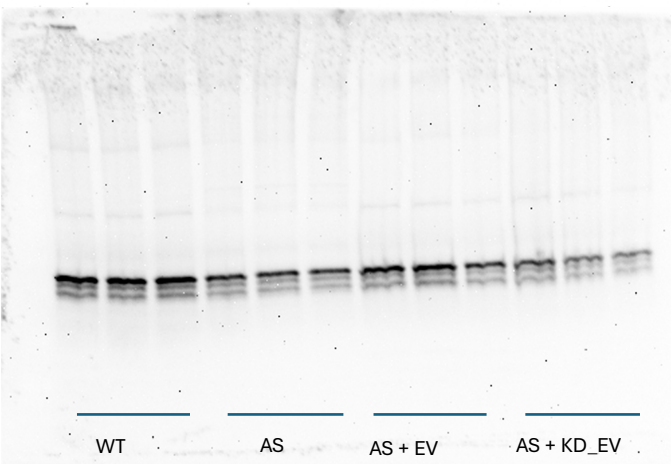

Suppl. Figure 6B

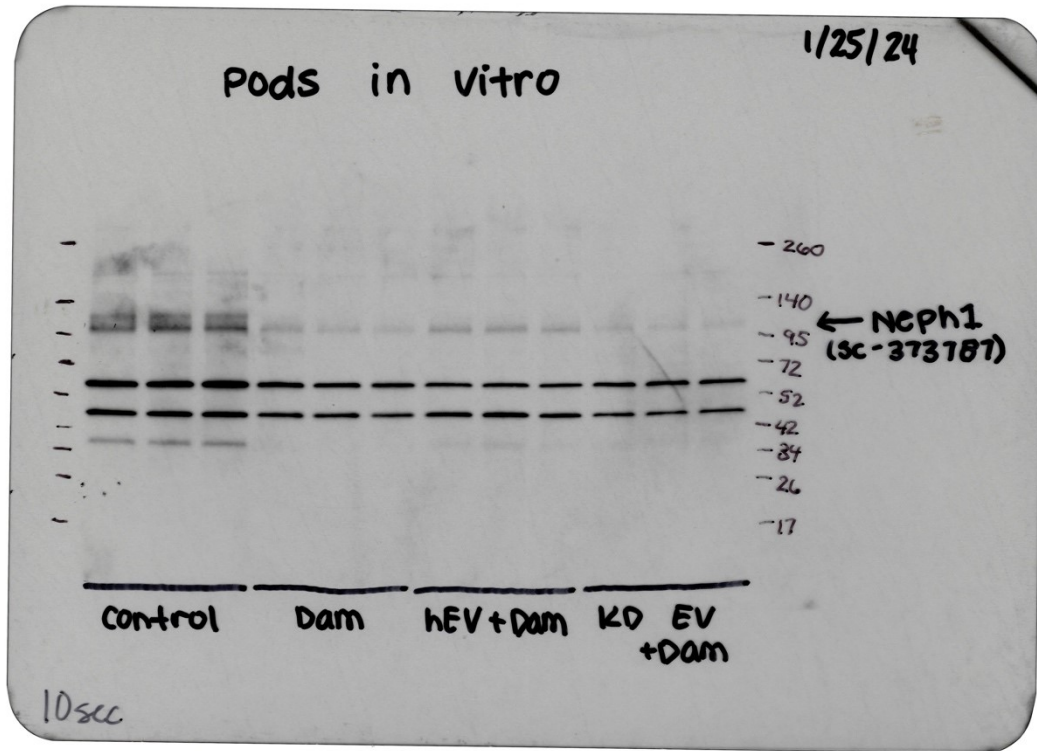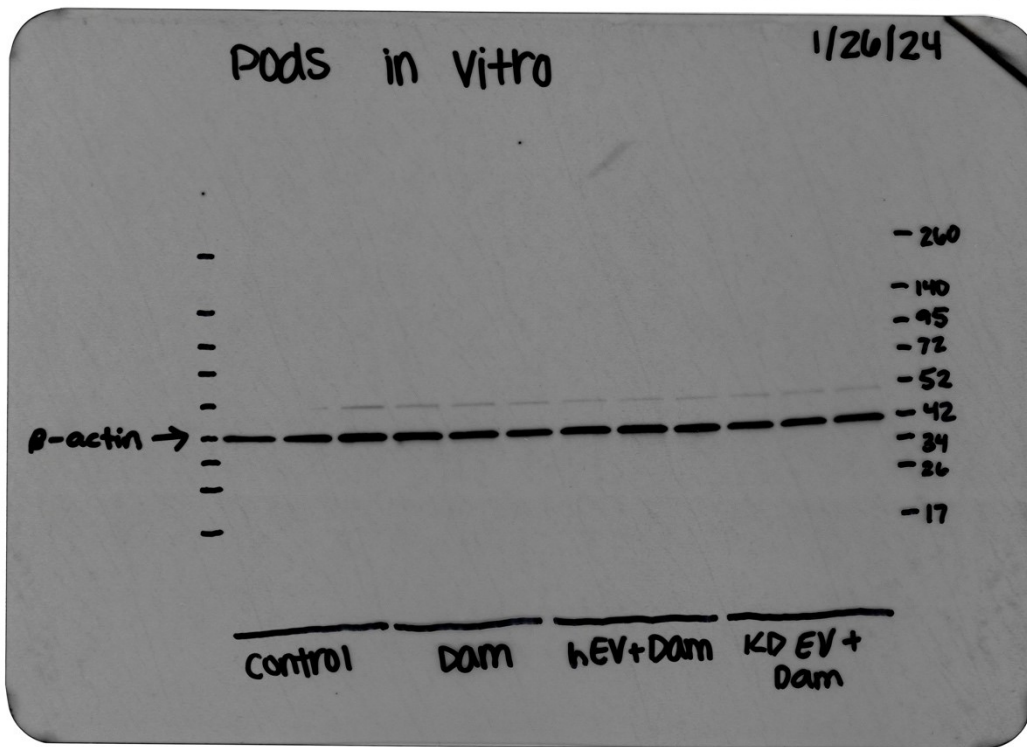

Suppl. Figure 6D

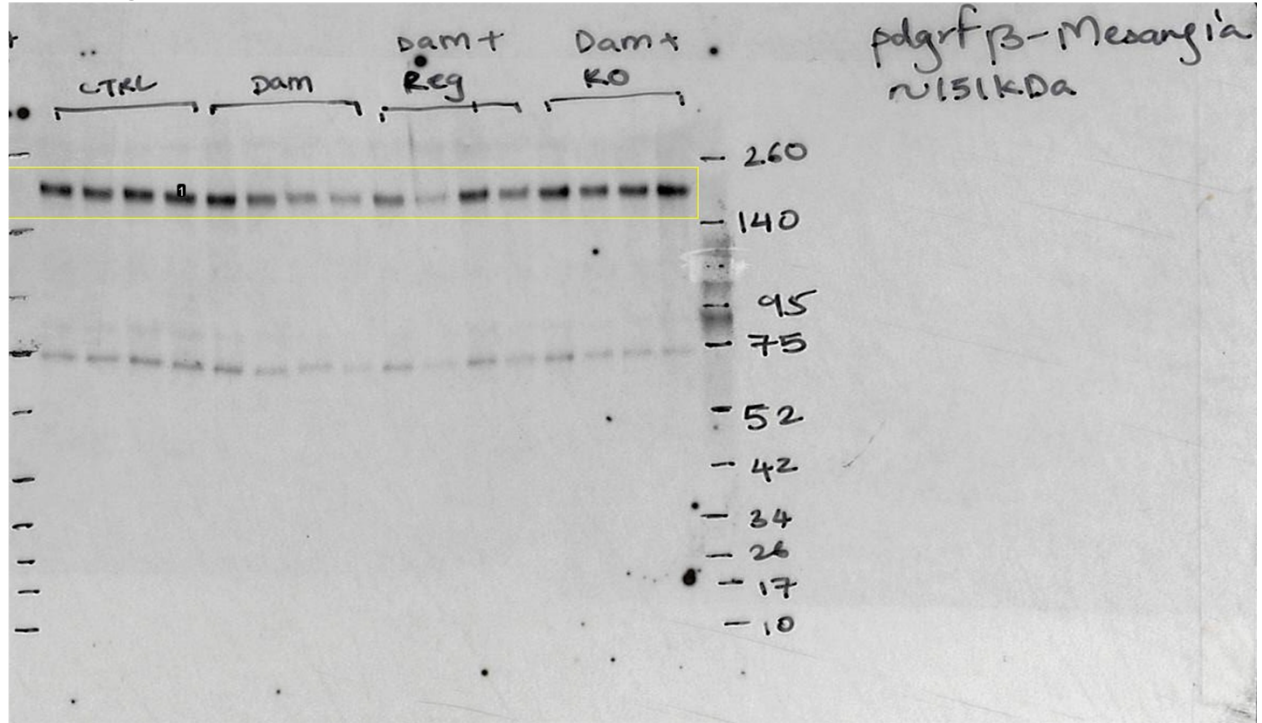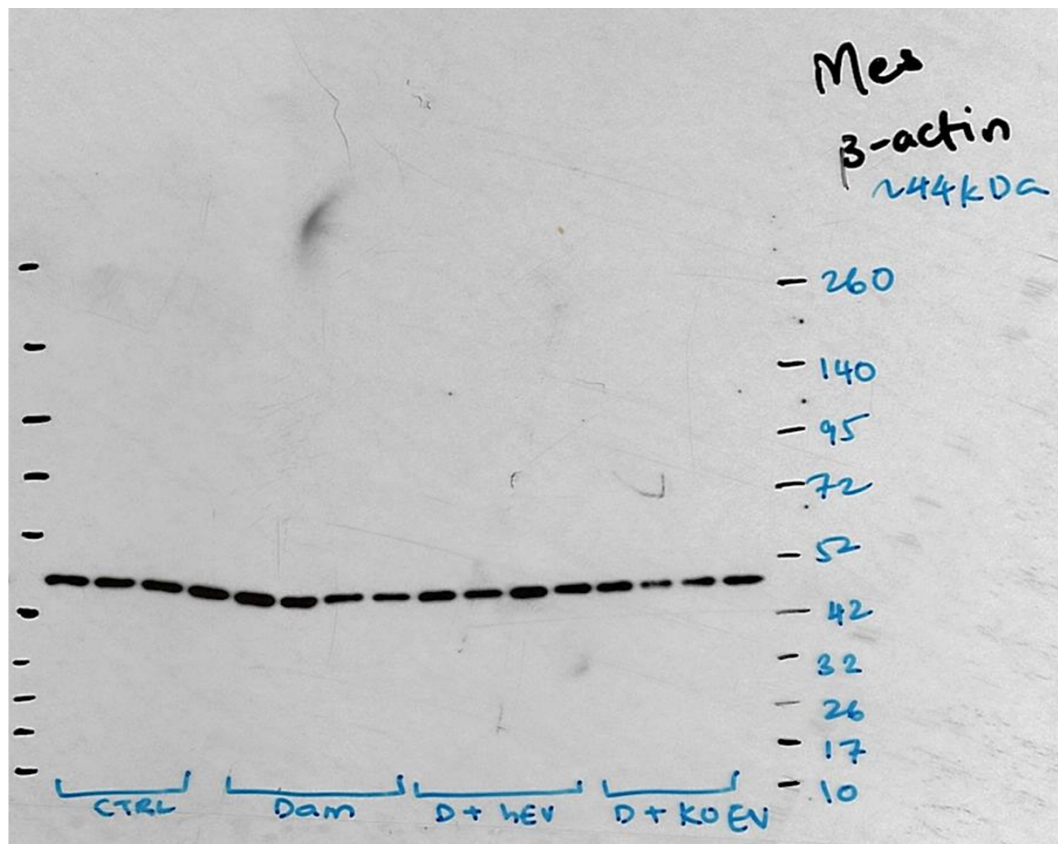

Supplement: sd19 [file 19]
